# Supplementary material for: Health Risk Assessment of Exposure to Air Pollutants Exceeding the New WHO Air Quality Guidelines (AQGs) in São Paulo, Brazil
Source: MDPI journal article supplement (doi:10.3390/ijerph20095707), 2023-05-02

# Health Risk Assessment of Exposure to Air Pollutants Exceeding the New WHO Air Quality Guidelines (AQGs) in São Paulo, Brazil

Caroline Fernanda Hei Wikuats <sup>1,\*</sup>, Thiago Nogueira <sup>2</sup>, Rafaela Squizzato <sup>1</sup>, Edmilson Dias de Freitas <sup>1</sup> and Maria de Fatima Andrade <sup>1</sup>

<sup>1</sup> Departamento de Ciências Atmosféricas, Instituto de Astronomia, Geofísica de Ciências Atmosféricas, Universidade de São Paulo, São Paulo 05508-090, Brazil

<sup>2</sup> Departamento de Saúde Ambiental, Faculdade de Saúde Pública, Universidade de São Paulo, São Paulo 01246-904, Brazil

\* Correspondence: caroline.wikuats@usp.br

Figure S1 – Hourly, monthly, and day-of-the-week variations for PM<sub>2.5</sub> (a), PM<sub>10</sub> (b), SO<sub>2</sub> (c), CO (d), NO<sub>2</sub> (e), and O<sub>3</sub> (f) during the sampling period. The shaded areas represent the 95% confidence intervals of the mean.

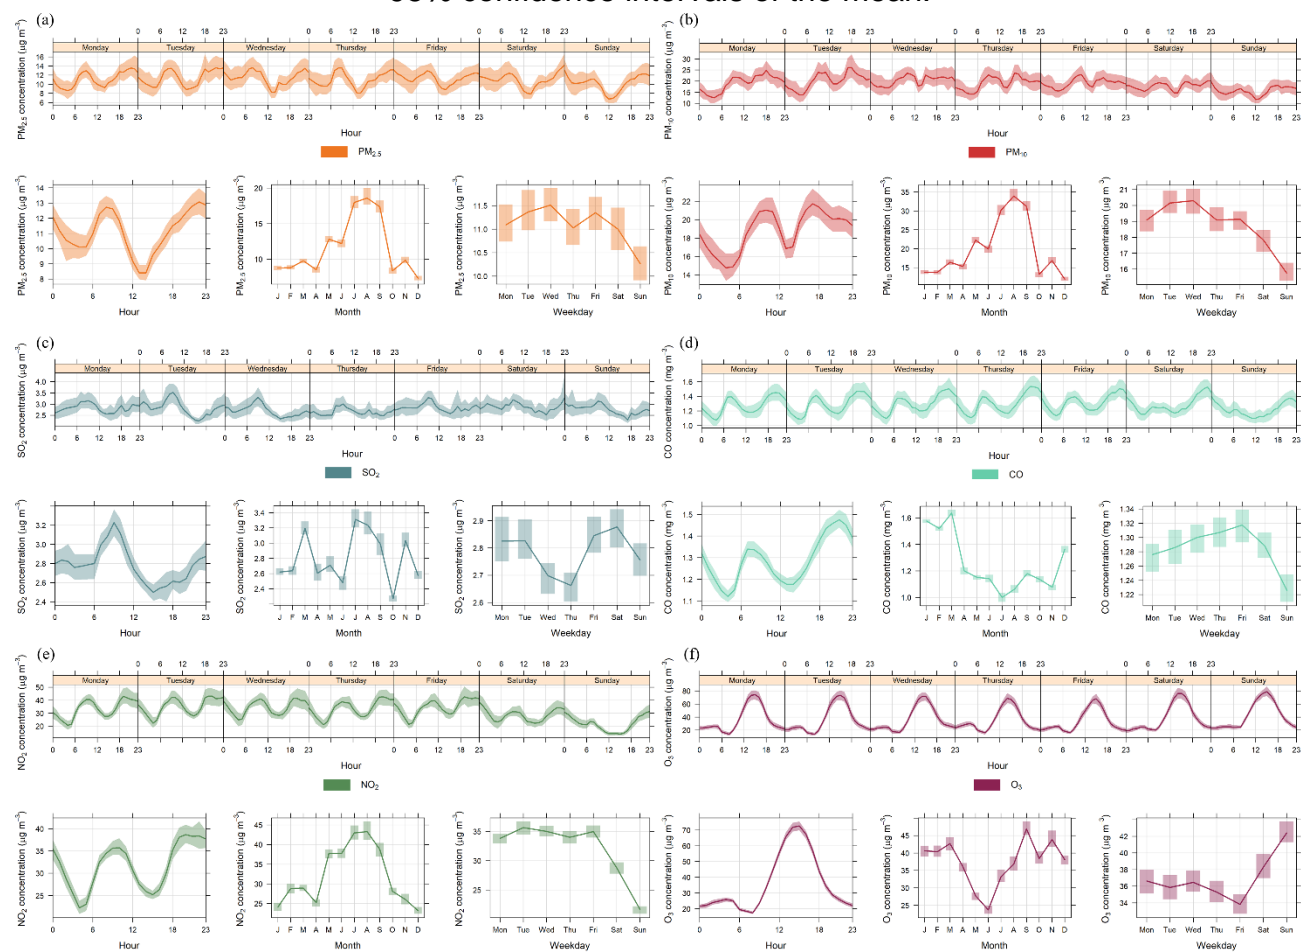

Figure S2 – 24-h time series for temperature (a), precipitation (b), relative humidity (c), and wind speed (d) during the sampling period.

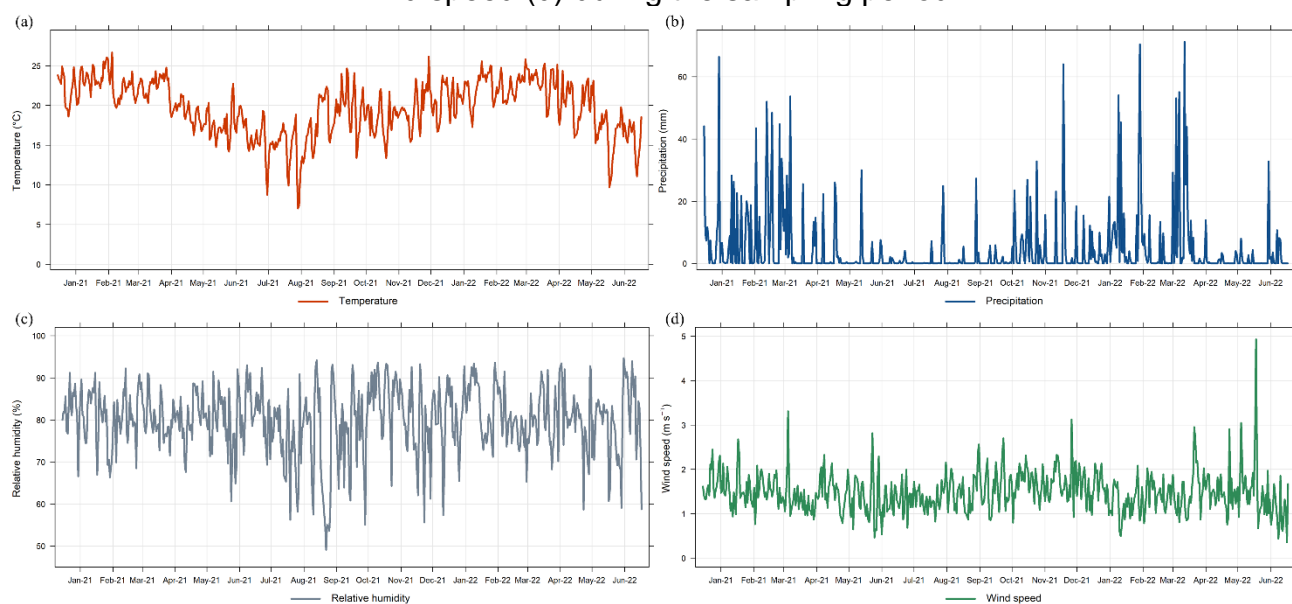

Figure S3 – Overall wind rose (a) and monthly wind roses (b) during the sampling period.

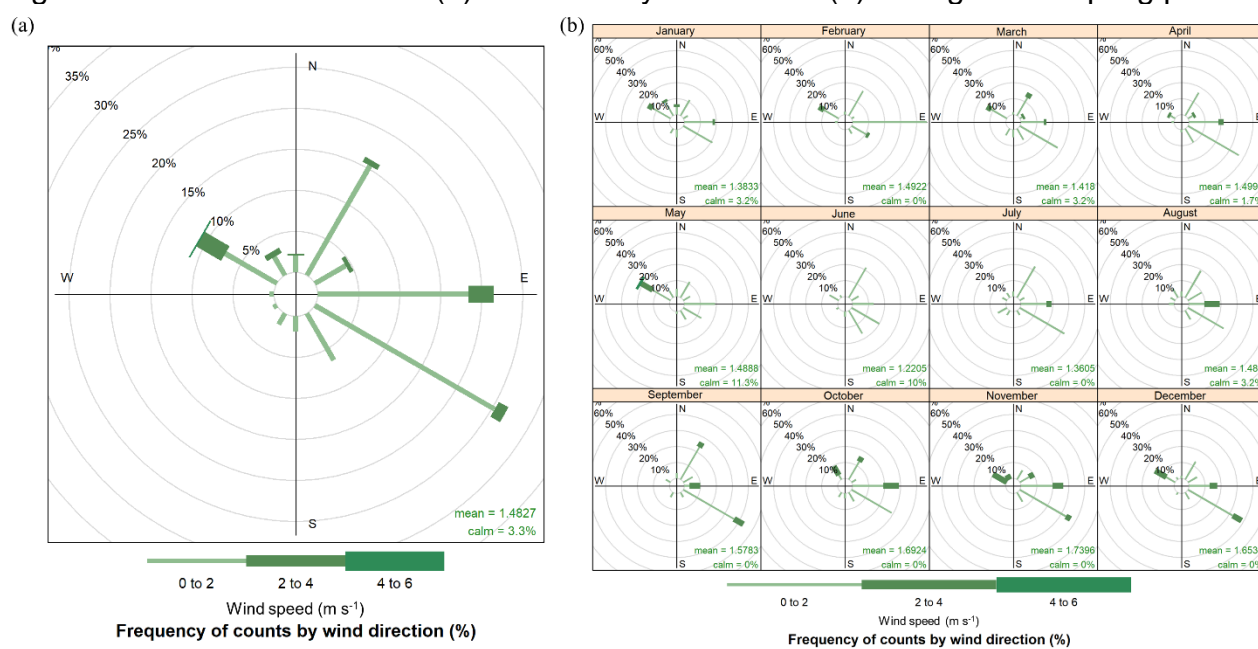

Supplement: s1 [file s1]
